# Supplementary material for: A novel approach for the determination of exchangeable copper in serum using protein precipitation
Source: Royal Society of Chemistry journal article supplement (doi:10.1039/d2ja00355d), 2022-12-29
Supplement: d2ja00355d1.pdf [file d2ja00355d1.pdf]

Supplementary information

# “A novel approach for the determination of exchangeable copper in serum using protein precipitation”

Max Tuchtenhagen<sup>1,2</sup>, Michael Stiboller<sup>3</sup>, Barbara Witt<sup>1</sup>, Tanja Schwerdtle<sup>1,2,4\*</sup>

<sup>1</sup>Department of Food Chemistry, Institute of Nutritional Science, University of Potsdam, Arthur-Scheunert-Allee 114 – 116, 14558 Nuthetal, Germany

<sup>2</sup>TraceAge-DFG Research Unit on Interactions of Trace Elements in Healthy and Diseased Elderly (FOR 2558), Berlin-Potsdam-Jena-Wuppertal, 14558 Nuthetal, Germany

<sup>3</sup>Institute of Chemistry – Analytical Chemistry, University of Graz, Universitätsplatz 1/I, 8010 Graz, Austria

<sup>4</sup>German Federal Institute for Risk Assessment (BfR), Max-Dohrn-Straße 8 – 10, 10589 Berlin, Germany

\*Correspondence: E-Mail: tanja.schwerdtle@uni-potsdam.de

Table S 1: Instrumental setup and analytical parameters for size-exclusion chromatography employed in this study

| <b>size exclusion chromatography</b> |                                                                                                                                               |
|--------------------------------------|-----------------------------------------------------------------------------------------------------------------------------------------------|
| <b>instrument</b>                    | Agilent 1260 Infinity HPLC System                                                                                                             |
| <b>column</b>                        | YMC-Pack Diol 200, 250 x 4.6 mm, 20 nm, S-5µm                                                                                                 |
| <b>flow rate</b>                     | 0.1 mL/min                                                                                                                                    |
| <b>run-time/sample</b>               | 40 min                                                                                                                                        |
| <b>injection volume</b>              | 10 µl                                                                                                                                         |
| <b>column temperature</b>            | 38°C                                                                                                                                          |
| <b>eluent</b>                        | 100 mM NH <sub>4</sub> NO <sub>3</sub> 50 mM KCl pH 6.8                                                                                       |
| <b>ICP-MS/MS parameter</b>           |                                                                                                                                               |
| <b>instrument</b>                    | Agilent 8800 ICP-QQQ-MS                                                                                                                       |
| <b>plasma RF power</b>               | 1550 W                                                                                                                                        |
| <b>nebulizer</b>                     | MicroMist (Glass Expansion, Melbourne Australia)                                                                                              |
| <b>spray chamber</b>                 | Scott-type                                                                                                                                    |
| <b>plasma gas flow</b>               | 15 L/min                                                                                                                                      |
| <b>auxiliary gas flow</b>            | 0.9 L/min                                                                                                                                     |
| <b>nebulizer gas flow</b>            | 1 L/min                                                                                                                                       |
| <b>spray chamber temperature</b>     | 2°C                                                                                                                                           |
| <b>cones</b>                         | Ni                                                                                                                                            |
| <b>sample depth</b>                  | 8.0 mm                                                                                                                                        |
| <b>gas mode</b>                      | O <sub>2</sub>                                                                                                                                |
| <b>cell gas flow</b>                 | 0.4 mL/min                                                                                                                                    |
| <b>mass transitions</b>              | 32→48 (S→SO <sup>+</sup> ) & 34→50 (S→SO <sup>+</sup> );<br>63→63 ( <sup>63</sup> Cu <sup>+</sup> ) & 65→65 ( <sup>65</sup> Cu <sup>+</sup> ) |
| <b>integration time</b>              | 0.1 s/point                                                                                                                                   |

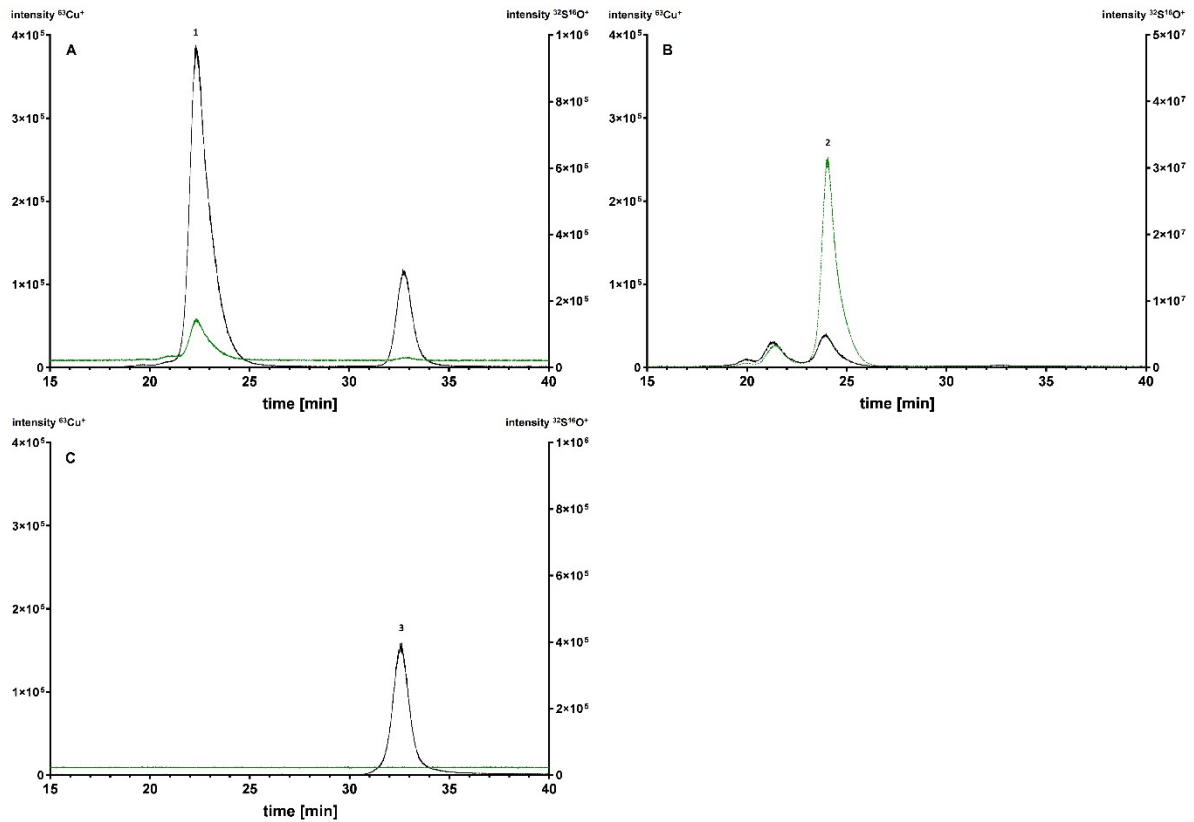

Figure S 1: Size exclusion chromatograms of commercially available protein standards (Sigma-Aldrich, Saint-Louis, MO, USA). The black solid line shows the  $^{63}\text{Cu}^+$  signal and the green dotted line shows the  $^{32}\text{S}^{16}\text{O}^+$  signal. Solutions of 50 g/L human serum albumin and 0.5 g/L ceruloplasmin were prepared in PBS buffer at pH 7.4 and diluted further 1:3 for SEC/ICP-MS/MS measurements. The chromatograms show (A) ceruloplasmin (B) human serum albumin (HSA) and (C) a  $100 \mu\text{g Cu/L CuCl}_2$  standard solution.

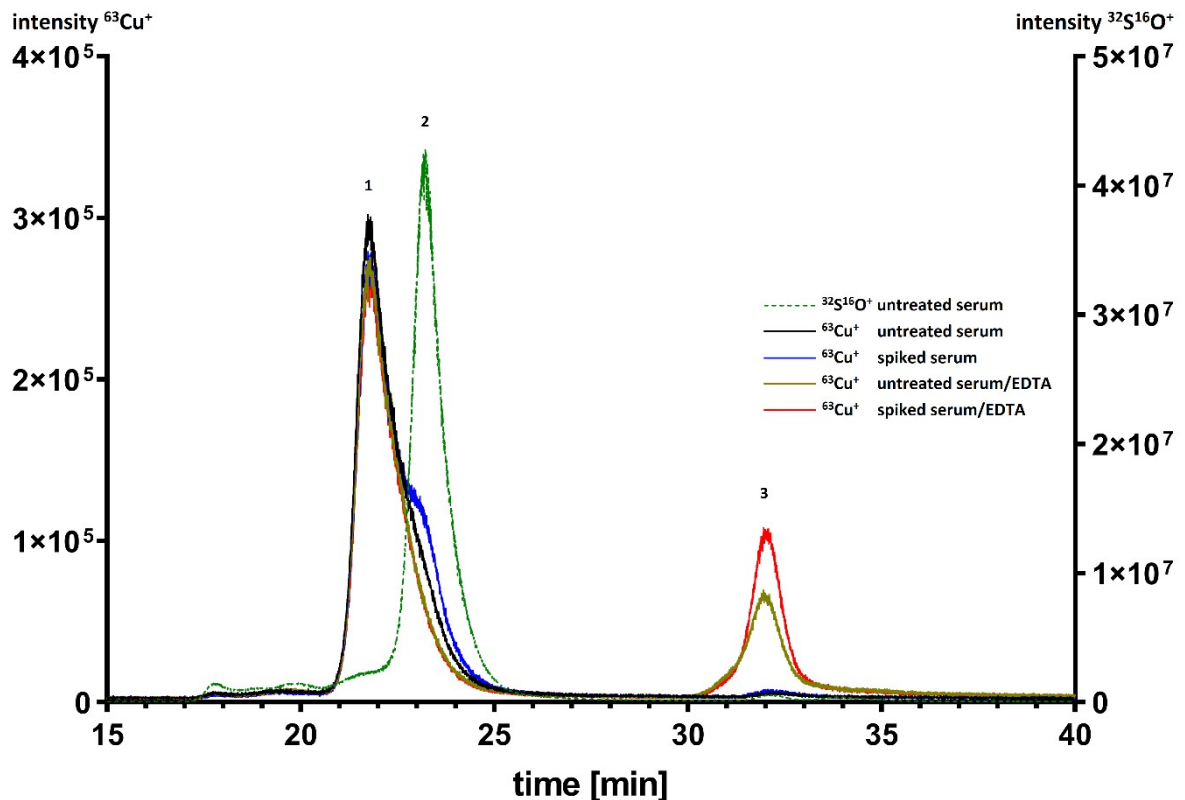

Fig. S 2: Comparison of size exclusion chromatograms of independent injections of a human serum sample.

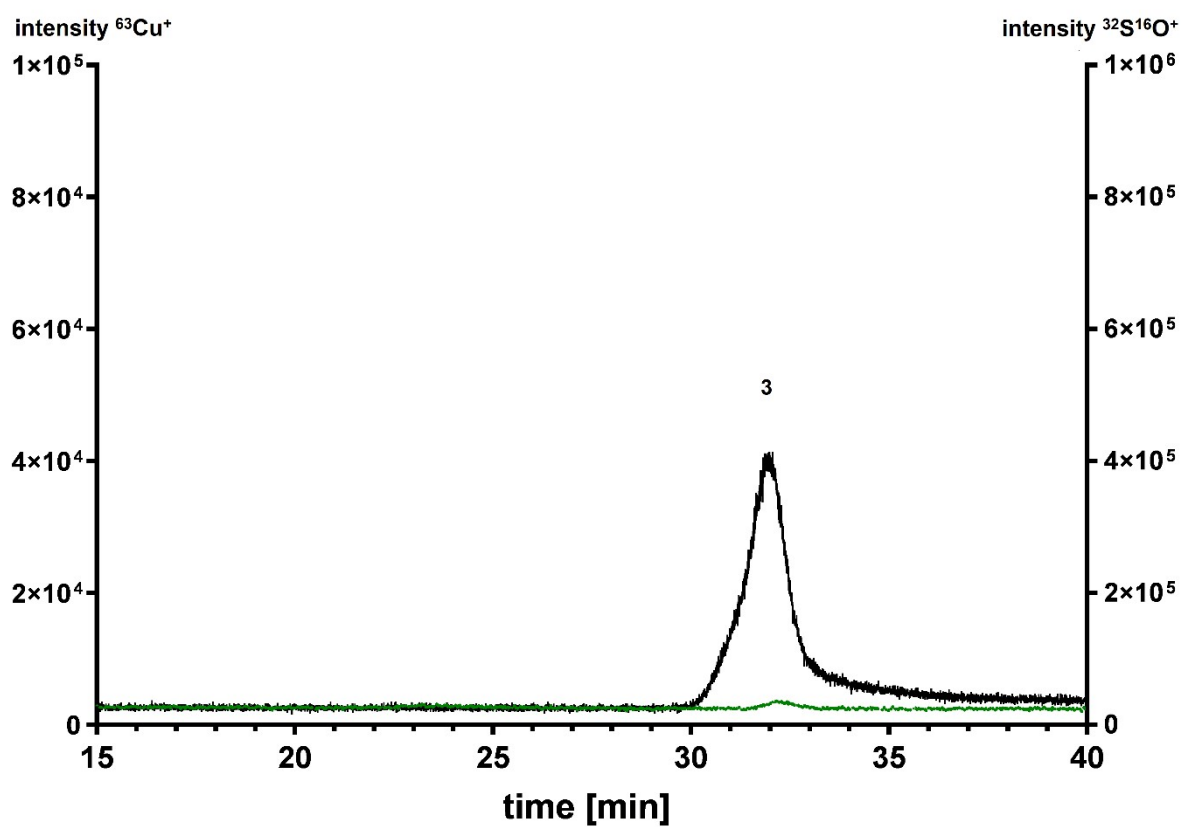

Fig. S 3: Size exclusion chromatogram of a human serum sample (V1) after application of the final method for the determination of CuEXC. black line:  $^{63}\text{Cu}^+$  signal, green dotted line:  $^{32}\text{S}^{16}\text{O}^+$  signal
